# Supplementary material
Source: HighWire-hosted journal article supplement (https://www.cancerbiomed.org/content/18/4/1040)
Supplement: media-1 [file media-1.pdf]

# Supplementary materials

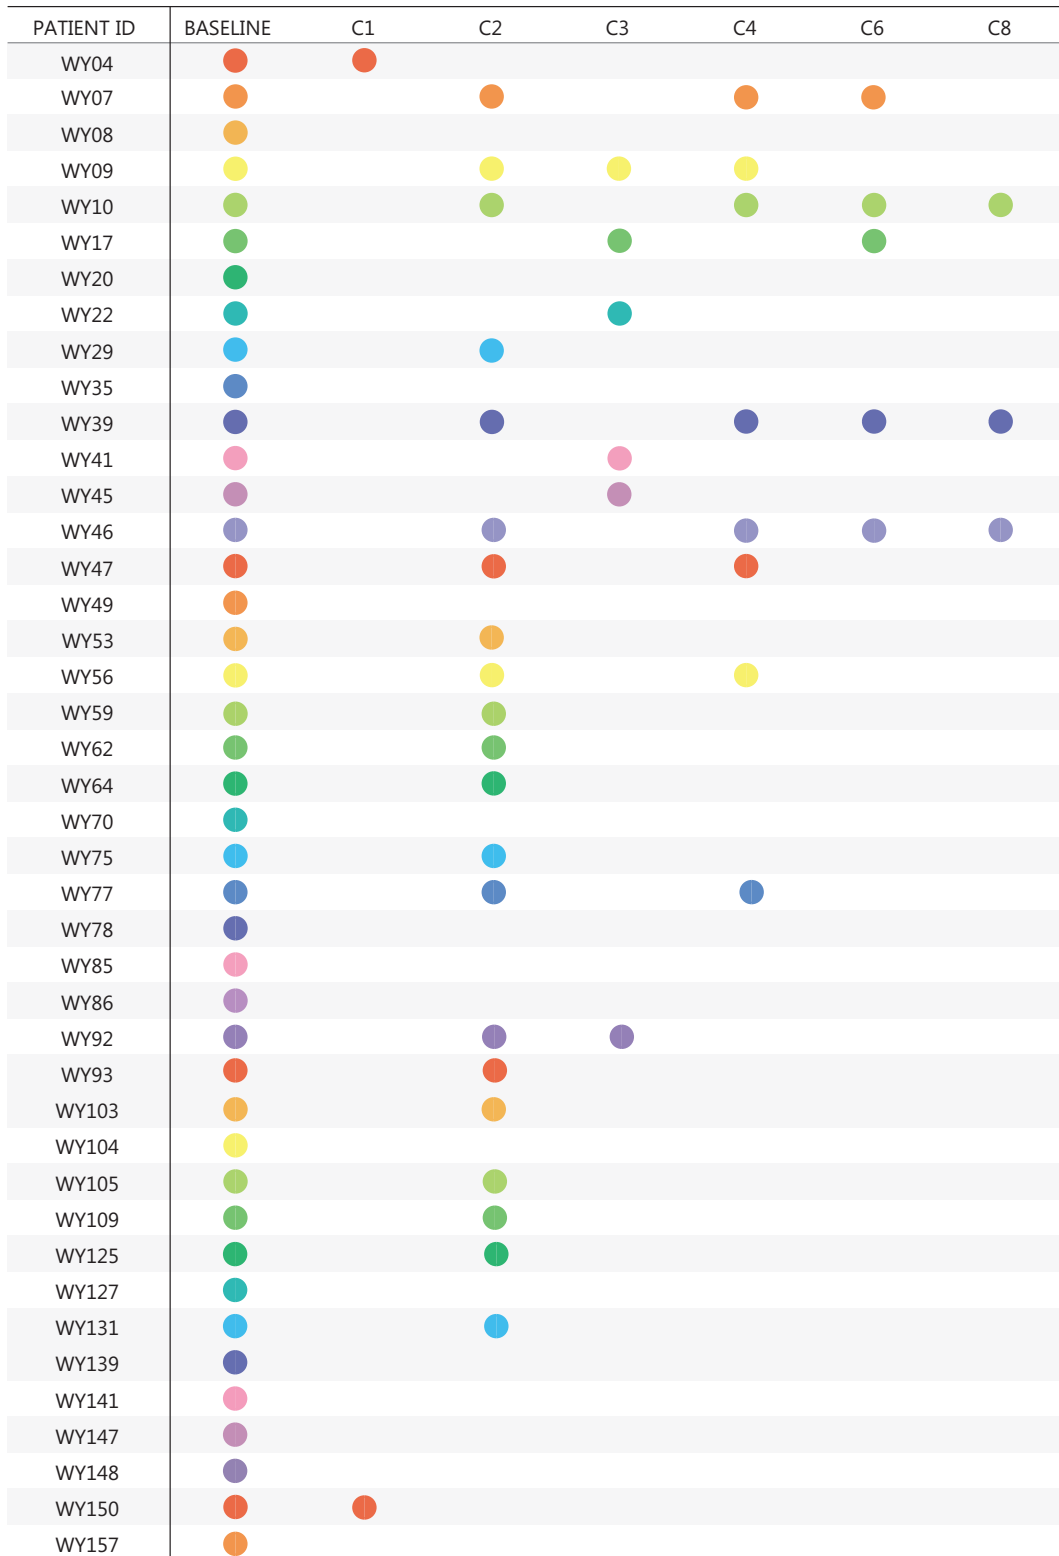

**Figure S1** A summary of each patient's sample time points.

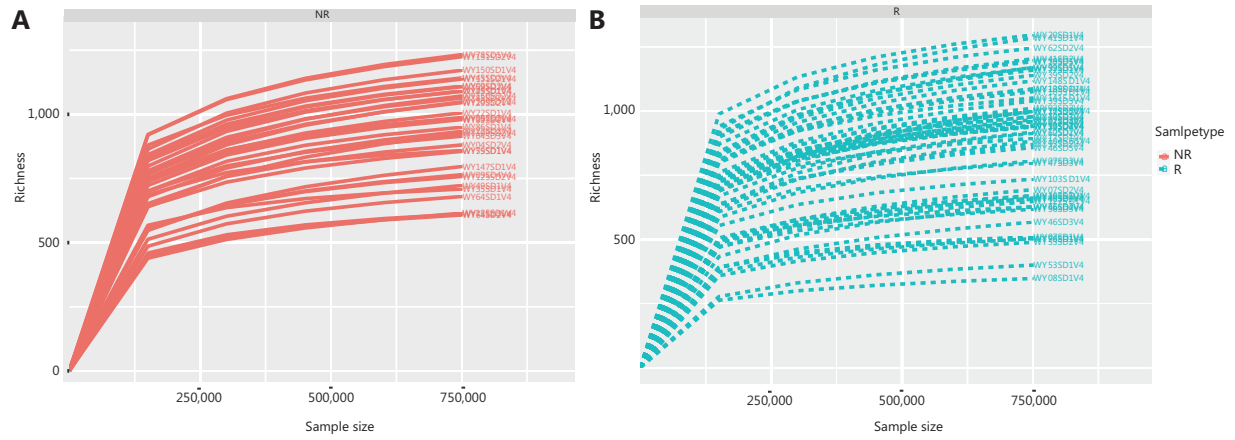

**Figure S2** Rarefaction curves of fecal samples using 16S ribosomal RNA gene sequencing from the nonresponder (A) and responder groups (B).

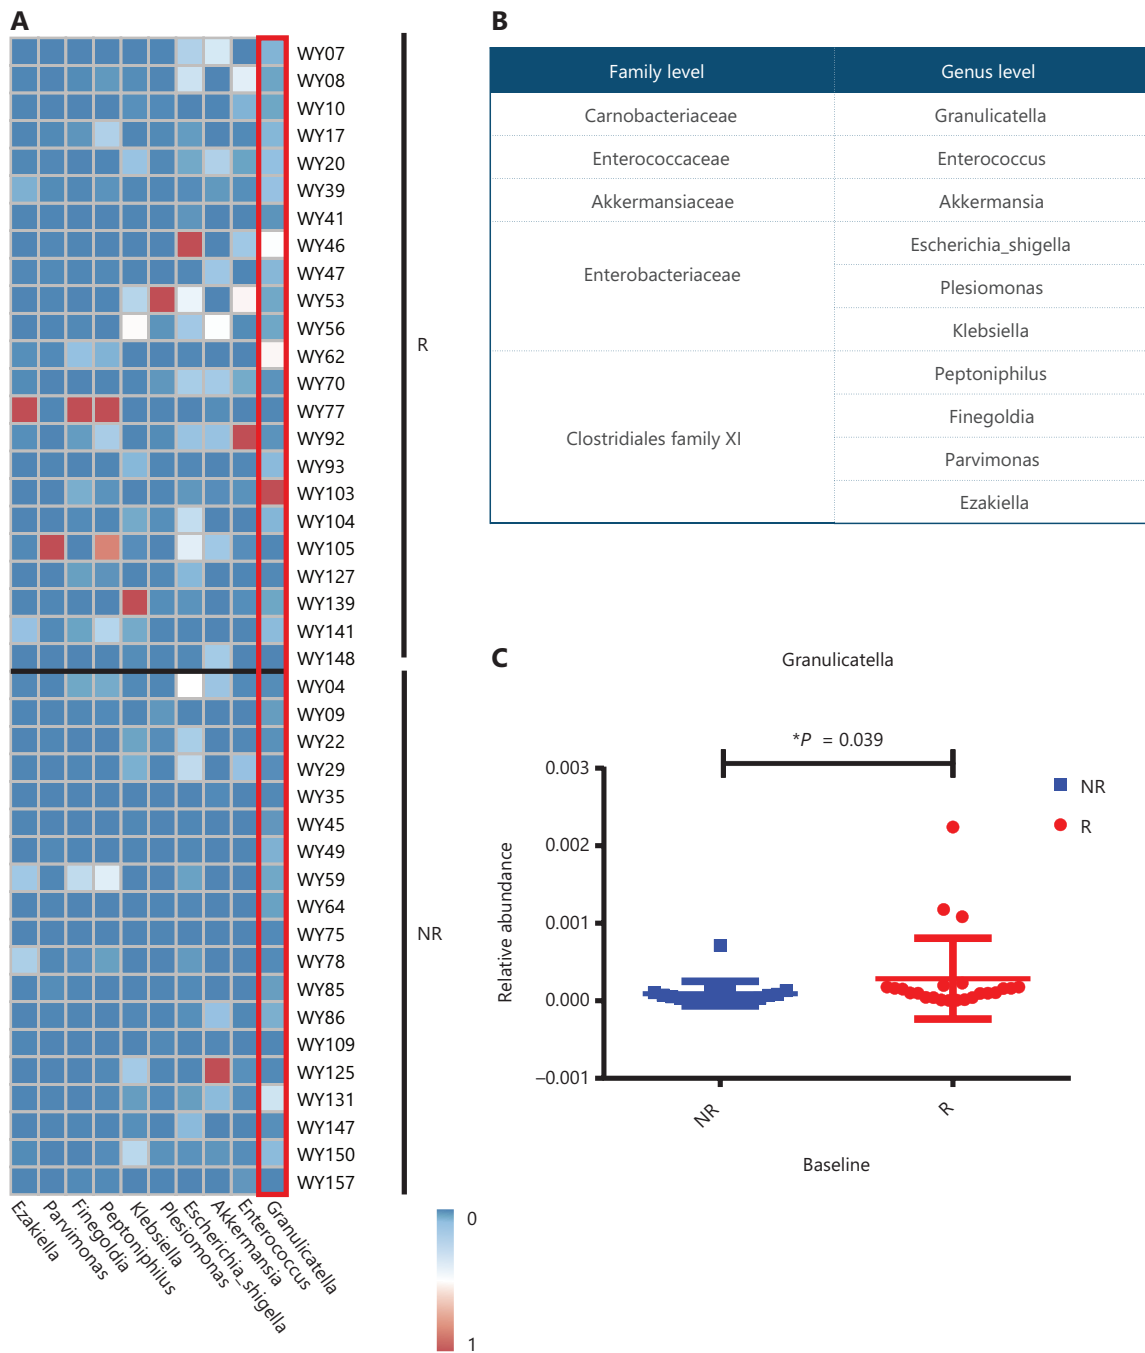

**Figure S3** Comparison of 5 bacterial families with different abundances at the genus level. (A) Heat map of the dominant gut microbial genera belonging to the 5 bacterial families. (B) Description of the commensal microbiome summarized at the family and genus levels. (C) Comparison of the *Granulicatella* bacterial genus between responders ( $n = 23$ ) and nonresponders ( $n = 19$ ). Statistical analysis was performed using the Mann-Whitney test.  $*P < 0.05$ .

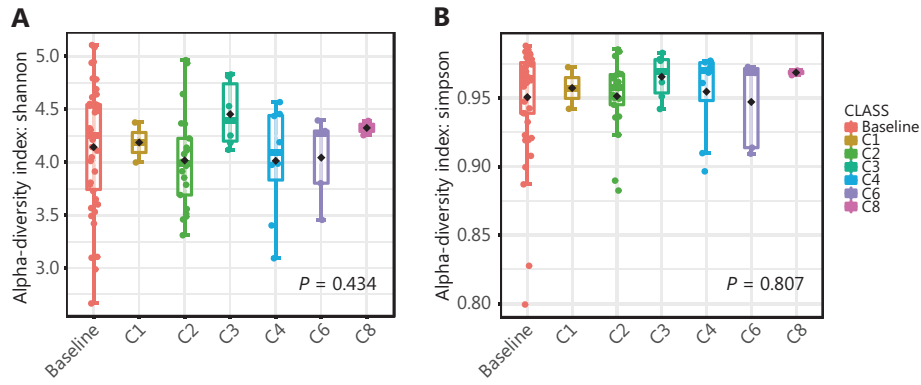

**Figure S4** The diversity of the gut microbiome during anti-PD-1 treatment. Dynamics of the Shannon index (A) and Simpson index (B) in longitudinal stool samples. Statistical analysis was performed using the Kruskal-Wallis test.  $P > 0.05$  for all tests.

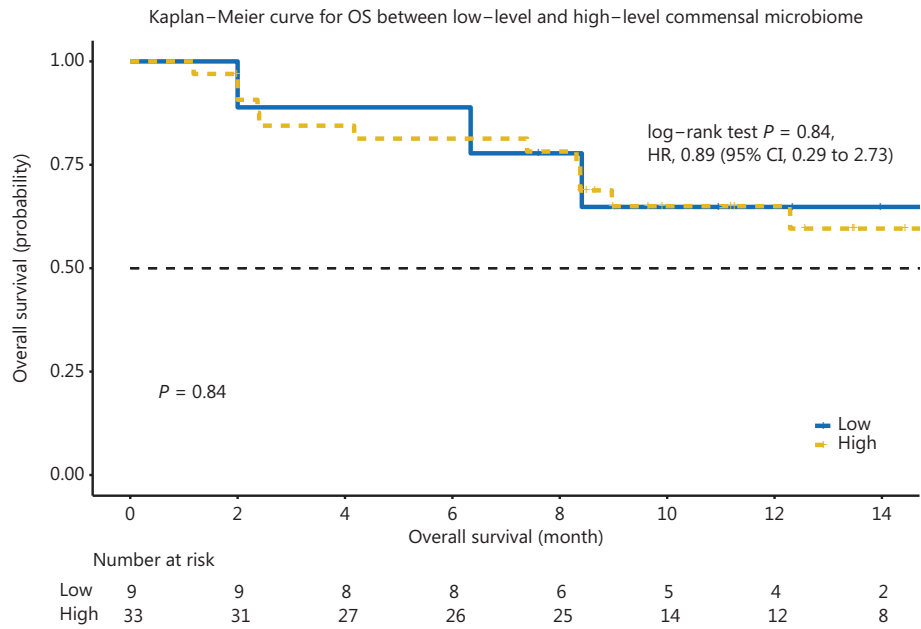

**Figure S5** Kaplan-Meier plot of overall survival with log-rank tests in patients treated with immune checkpoint inhibitors, stratified by high versus low levels of the baseline commensal microbes.

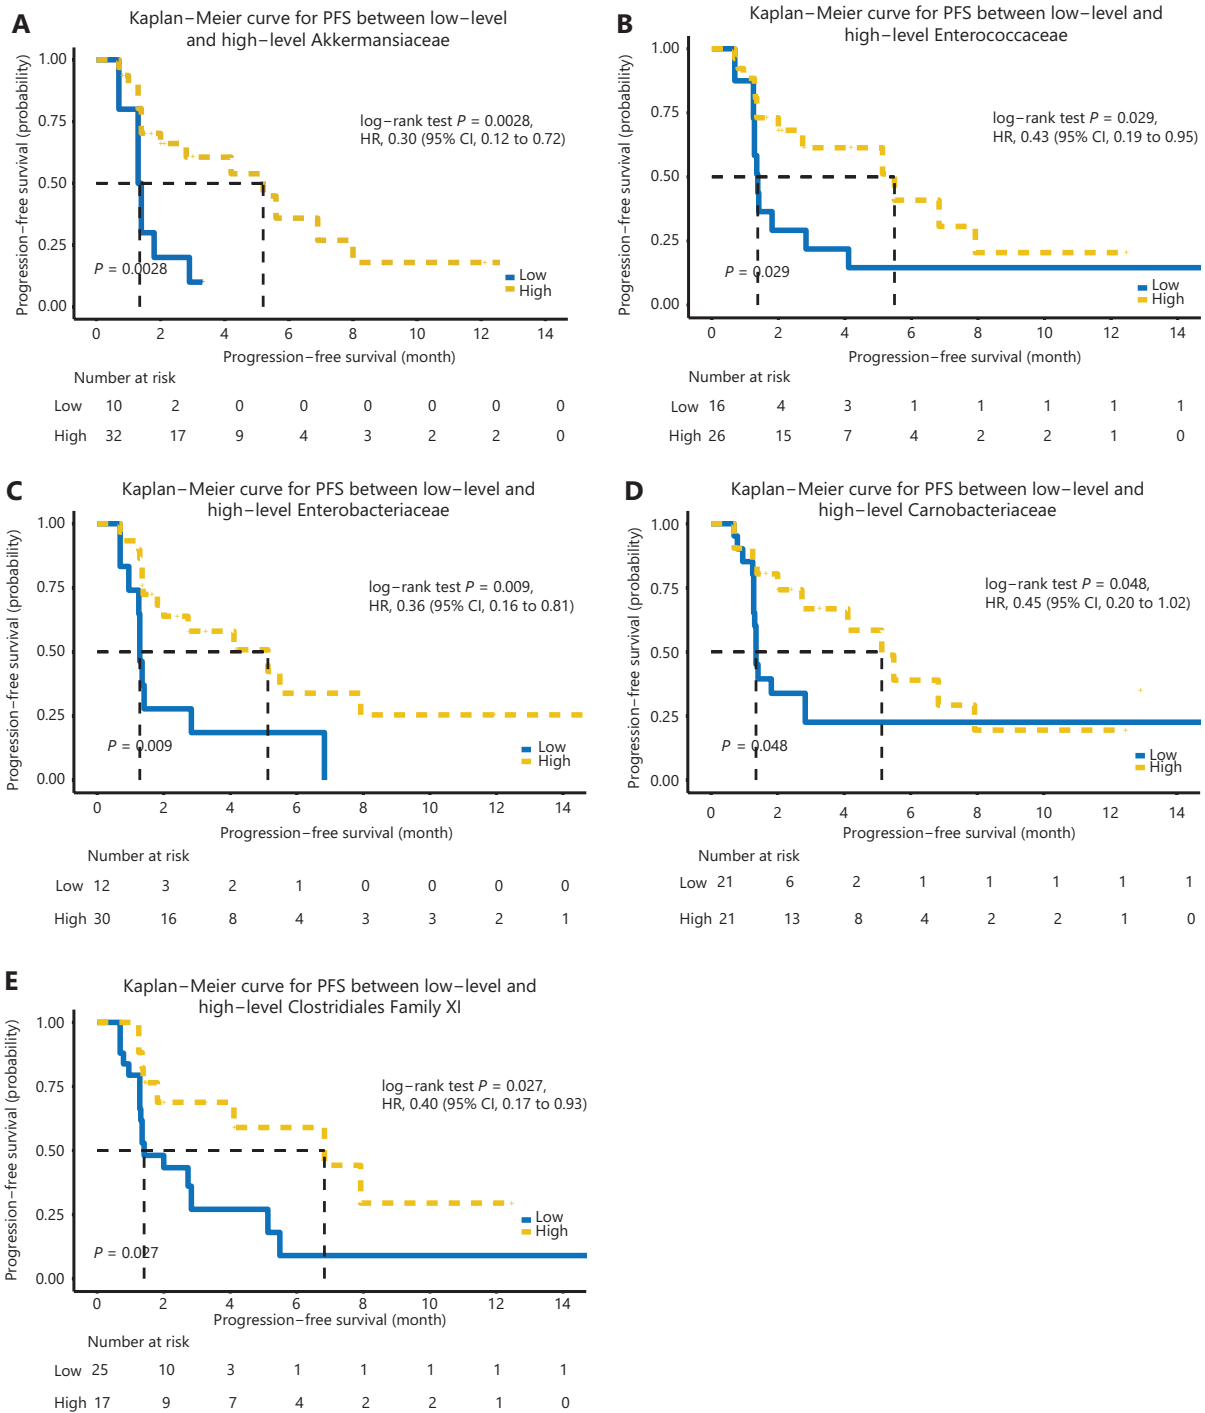

**Figure S6** Kaplan-Meier plot of progression-free survival using log-rank tests in patients with high versus low levels of *Akkermansiaceae* (A), *Enterococcaceae* (B), *Enterobacteriaceae* (C), *Carnobacteriaceae* (D), and *Clostridiales Family XI* (E).
